# Supplementary material for: Metal ion induced dual switchable dielectric and luminescent properties in hybrid halides
Source: Royal Society of Chemistry journal article supplement (doi:10.1039/d2dt02148j), 2022-01-01
Supplement: d2dt02148j1.pdf [file d2dt02148j1.pdf]

## Electronic Supplementary Information

### Metal Ions Induced Dual Switchable Dielectric and Luminescent

#### Properties in Hybrid Halides

Jia Liu,<sup>a</sup> Li-Jun Han,<sup>a</sup> Ting Shao,<sup>a</sup> Chang-Yuan Su,<sup>b</sup> Ming Chen,<sup>b</sup> Pei-Zhi Huang,<sup>a</sup> Qiang-Qiang Jia,<sup>a</sup> Da-Wei Fu<sup>\*a</sup> and Hai-Feng Lu<sup>\*a</sup>

a. Institute for Science and Applications of Molecular Ferroelectrics, Key Laboratory of the Ministry of Education for Advanced Catalysis Materials, Zhejiang Normal University, Jinhua, 321004, P. R. China.

\*E-mail: [luhaifeng@zjnu.edu.cn](mailto:luhaifeng@zjnu.edu.cn) [dawei@zjnu.edu.cn](mailto:dawei@zjnu.edu.cn)

b. Ordered Matter Science Research Centre, Jiangsu Key Laboratory for Science and Applications of Molecular Ferroelectrics, Southeast University, Nanjing 211189, P.R. China.

## Experiments section

### Synthesis

All reagents and solvents used in this study are commercial analytical grade resources without further purification. To get compound **1**, 3-Chloro-N,N-dimethylaniline (3mmol, 0.467 g) was dissolved in hydrochloric acid (20 mL), add 10 ml water for further dissolution, and then metal halide BiCl<sub>3</sub> (3mmol, 0.946 g) was added to obtain the mixed solution. The synthesis method of the other three compounds is similar to that of compound **1**, where the metal halides are replaced by ZnCl<sub>2</sub> (3mmol, 0.409g), CdCl<sub>2</sub> (3mmol, 0.685g), MnCl<sub>2</sub> (3mmol, 0.286g). The four mixed solutions are stirred at room temperature until completely dissolved, lately, a clear solution is obtained. Then, the slow evaporation at room temperature was carried out for about three weeks to obtain colorless prismatic crystals (compounds **1** and **2**), colorless block, and green prismatic crystals respectively.

### X-ray Single Crystal Diffraction

Variable-temperature single-crystal X-ray diffraction information was collected by using Bruker APEX-II CCD with Mo K $\alpha$  radiation ( $\lambda = 0.71073 \text{ \AA}$ ). Compound **1** was collected at 273 K and 320 K, compounds **2** and **3** collected at 273 K, and compound **4** was collected at 273 K, 358 K, and 365 K respectively. Data processing was finished by APEX3. The crystal structure of compounds **1** and **2** before and after phase transition were solved by direct method and refined by full-matrix least-squares methods based on F2 in the SHELXTL software package. All non-hydrogen atoms were refined

anisotropically and the positions of all hydrogen atoms were generated geometrically. The asymmetric unit and packing diagrams of compounds **1** and **2** were drawn by DIAMOND software.

### **Dielectric correlation measurement**

DSC measurements were carried out by PerkinElmer diamond DSC instrument in nitrogen atmosphere, 9 mg powder samples of compounds **1** and **2** were weighed and placed in an aluminum crucible, and then heated and cooled at a heating rate of 20 K min<sup>-1</sup> in the temperature range of 255 K to 355 K and 335 K to 375 K, respectively. Thermogravimetric analysis (TGA) was performed on a TA Q50 system in the temperature range of 350 K to 950 K and 300 K to 1000 K with heating rate of 10 K min<sup>-1</sup>.

### **Temperature-Dependent Dielectric Permittivity Measurements and Powder X-ray Diffractions.**

The powder-pressed pellet of compounds **1** and **2** pasted with carbon conducting glue was used in dielectric measurements. The dielectric constant in heating and cooling cycles was measured on Tonghui th28a instrument.

Powder X-ray diffraction (PXRD) data for compounds **1** and **2** were measured on a D8 Advance03030502 X-ray diffractometer at room temperature. Diffraction patterns were collected in the 2 $\theta$  range of 5~55° with a step size of 0.02°.

### **Photoluminescence Spectrum Measurements**

The solid-state excitation and emission spectra of compound **2** were measured on the Edinburgh FLS-920 fluorescence spectrometer. The absolute quantum efficiency is measured by the combined use of the Edinburgh FLS-920 fluorescence spectrometer and integrating sphere to obtain the photoluminescence quantum yield (PLQY).

### **Hirshfeld Surfaces and Intermolecular Interaction Analysis**

Use the crystal explorer program to calculate Hirshfeld surface and two-dimensional fingerprint, compound **1** and compound **2**, and input the structure file in

CIF format under 273 K / 320 K and 273 K / 358 K / 365 K. In this work, all the Hirshfeld surfaces were generated using a standard (high) surface resolution. The 3D Hirshfeld surfaces and 2D fingerprint plots are unique for any crystal structure. The intensity of molecular interaction is mapped onto the Hirshfeld surface by using the respective red-blue-white scheme: where the red, white, and blue are represent the contacts shorter than, equal to, and longer than the van der Waals distances, respectively. In 2D fingerprint plots, each point represents an individual pair ( $d_i$ ,  $d_e$ ), reflecting the distances to the nearest atom inside ( $d_i$ ) and outside ( $d_e$ ) of the Hirshfeld  $d_{norm}$  surface.

$$d_{norm} = \frac{d_i - r^{vdW}}{r_i^{vdW}} + \frac{d_e - r}{r_e^{vdW}}$$

$d_{norm}$  surface represents close intermolecular interactions.

For clear analysis and comparison, we focus on the selected cations with relatively stronger contacts in the respective structures.

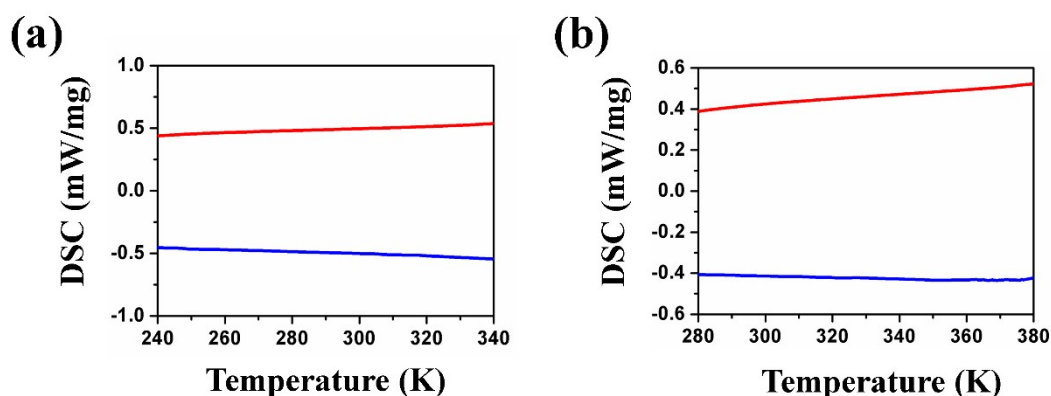

Fig. S1 DSC diagrams of compound 2 (a) and compound 3 (b).

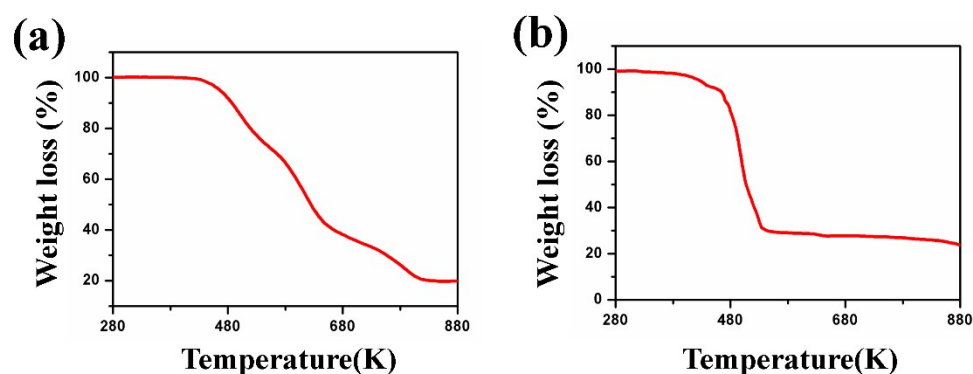

**Fig. S2** Experimental TGA curves of compounds **1** (a) and **4** (b) in the temperature range from 280 K to 880 K

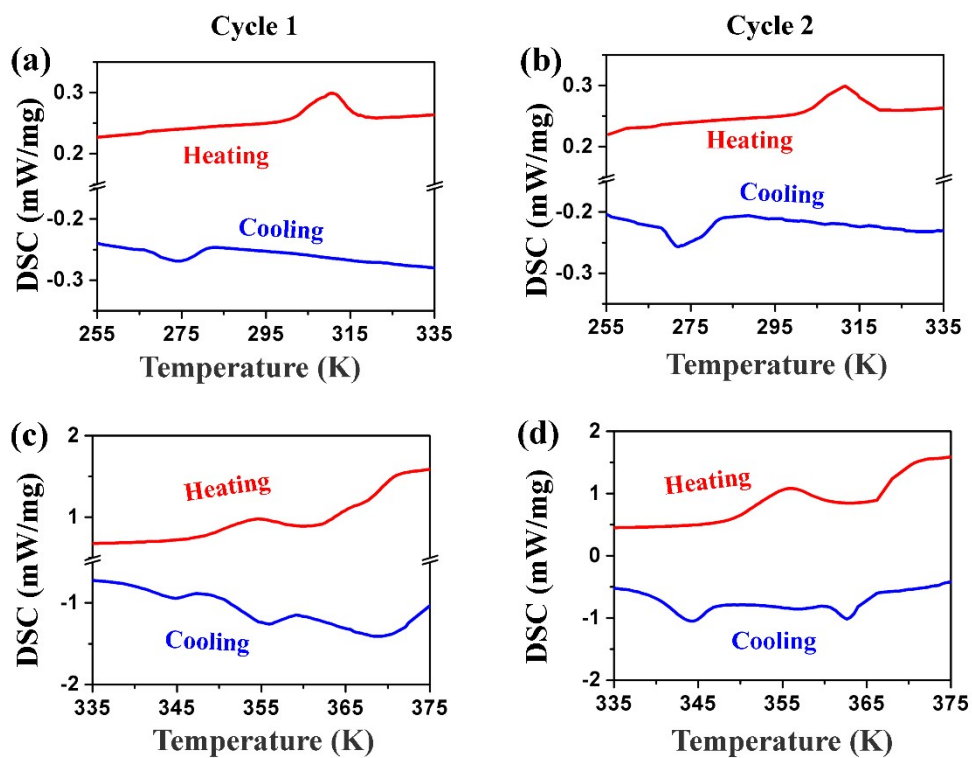

**Fig. S3** DSC cycle plots of compound **1** (a), (b) and compound **4** (c), (d).

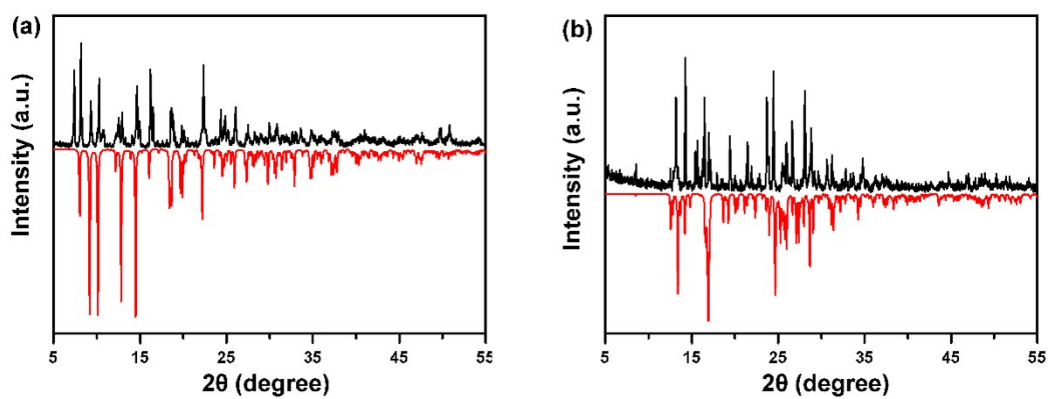

**Fig. S4** Measured and simulated powder X-ray diffraction patterns of compounds **1** and **4** at 298 K.

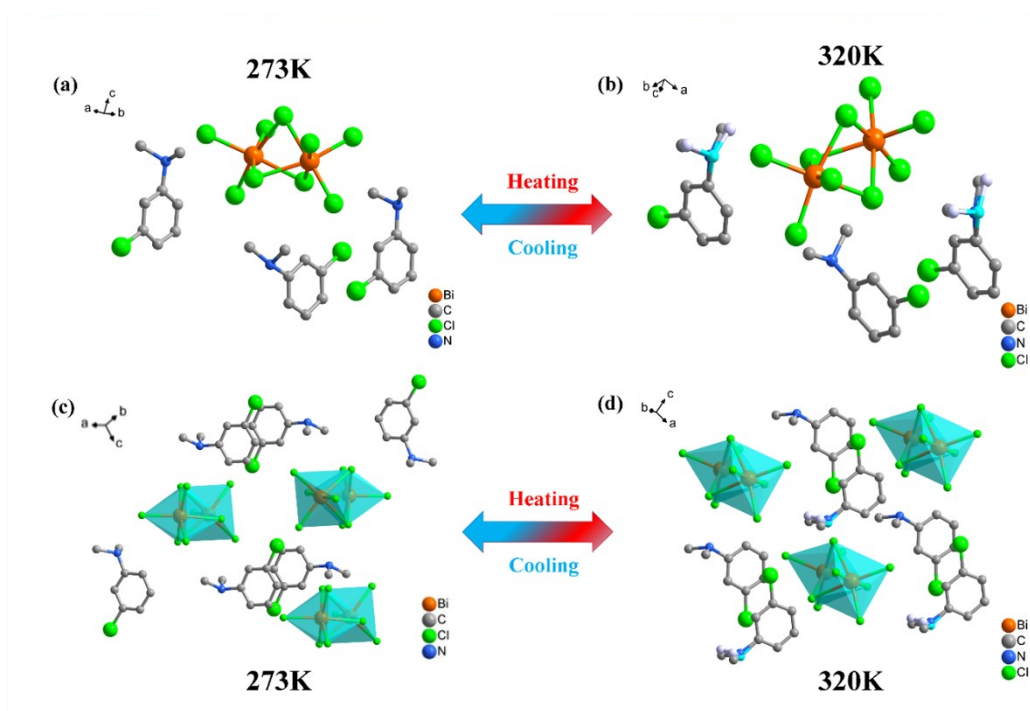

**Fig. S5** (a) and (b) show the structural changes of the smallest asymmetric unit of compound **1** before and after heating. Stacking diagram of compound **1** at 273 K (c) and 320 K (d).

For compound **1**, at 273K, it crystallizes in the space group  $P2(1)/m$ , and the unit cell parameters are  $a = 9.5873(11) \text{ \AA}$ ,  $b = 22.042(3) \text{ \AA}$ ,  $c = 9.7222(12) \text{ \AA}$ ,  $\beta = 97.630(3)^\circ$ ,  $V = 2377.61(17) \text{ \AA}^3$  and  $Z = 2$ . When heated to 320 K, the space group of compound **1** remain unchanged, with unit parameters  $a = 9.6132(10) \text{ \AA}$ ,  $b = 22.150(3) \text{ \AA}$ ,  $c = 9.7574(12) \text{ \AA}$ ,  $\beta = 97.628(3)^\circ$ ,  $V = 2059.3(4) \text{ \AA}^3$  and  $Z=2$  (Table S1). In addition, the zero-dimensional stacked structure of compound **1** containing organic ammonium and organic components was exhibited in Fig. S3. Although the cell parameters of compound **1** did not change significantly in the high temperature (HTP) stage compared with the low temperature stage (LTP), partial organic amine cations showed obvious disorder with the temperature rising. This process is clearly showed in Fig. S3.

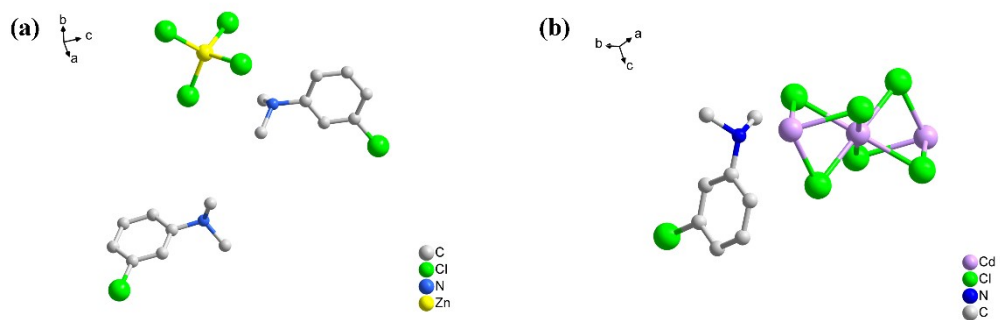

**Fig. S6** (a) and (b) show the structural changes of the smallest asymmetric unit of compound **2** and compound **3** at 273K.

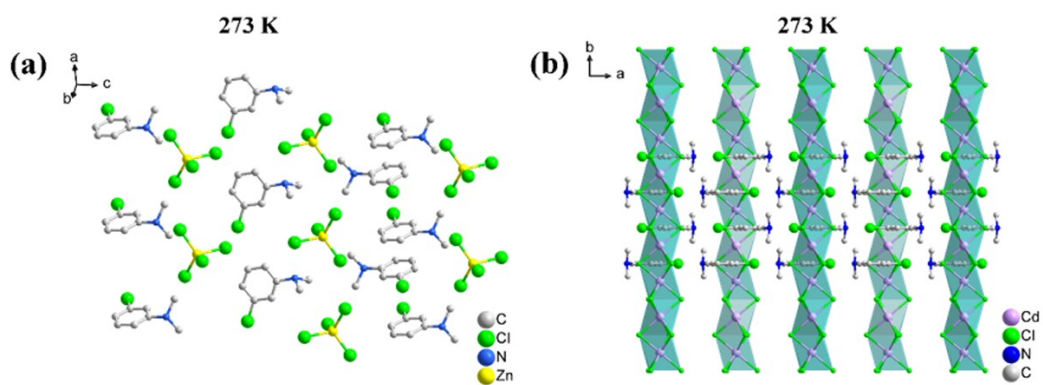

**Fig. S7** Packaging diagram of compound **2** and compound **3** at 273 K.

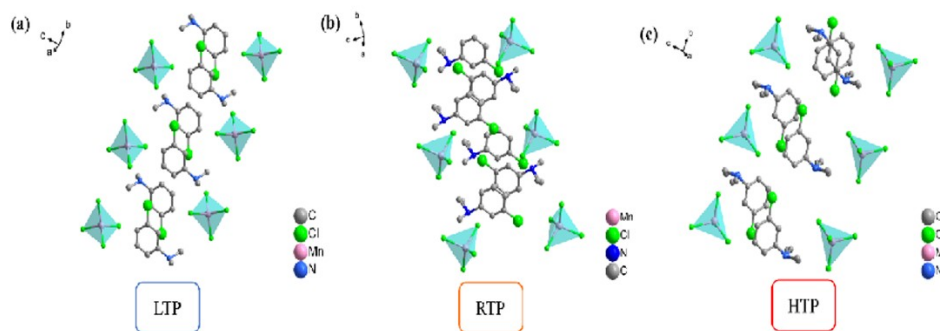

**Fig. S8** Packaging diagram of compound **4** in LTP (a), RTP (b) and HTP (c).

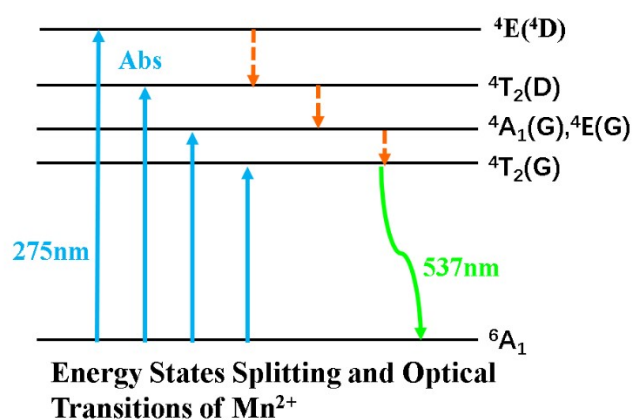

**Fig. S9** The energy states splitting and optical transitions in tetrahedrally coordinated Mn<sup>2+</sup> ion.

The energy level  $A_1$  corresponds to the non-excited state (ground state) of compound **4**, while the green emission peak is 537 nm, which comes from the lowest  ${}^4T_1 \rightarrow {}^6A_1$  transition. There are four main excitation peaks in the excitation spectrum of compound **4**, among which 275 nm belongs to a wide absorption band, while 355 nm, 430 nm and 450 nm are weak excitation bands, which belong to  ${}^4T_2(D) \rightarrow {}^6A_1$ ,  ${}^4A_1(G) \rightarrow {}^6A_1$  and  ${}^4E(G) \rightarrow {}^6A_1$  and  ${}^4T_2(G) \rightarrow {}^6A_1$  transition respectively.



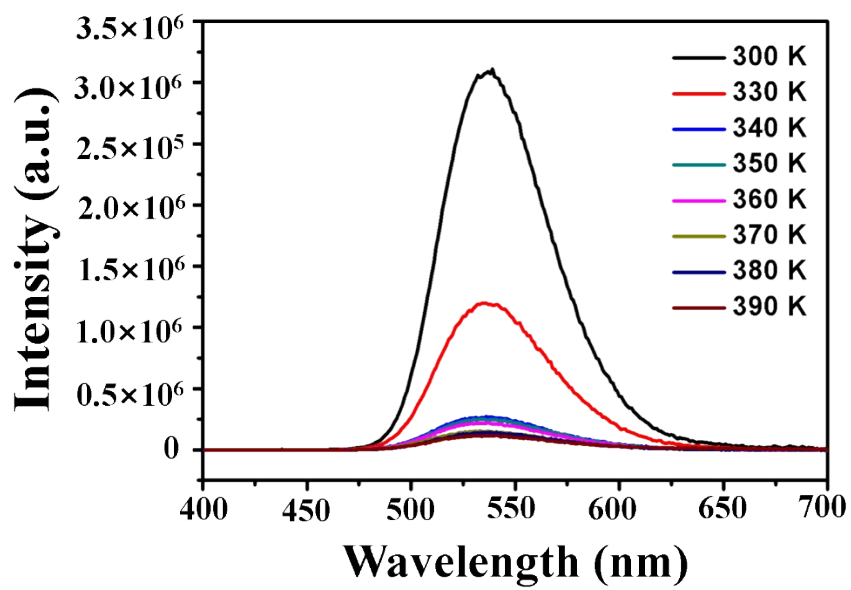

**Fig. S10** Variable temperature fluorescence analysis plot of compound 4.

**Table S1.** Crystal data and structure refinements for compound **1** at 273 K and 320 K

|                                      | <b>LTP (273 K)</b>                                                              | <b>HTP (320 K)</b>                                                              |
|--------------------------------------|---------------------------------------------------------------------------------|---------------------------------------------------------------------------------|
| <b>Empirical formula</b>             | C <sub>24</sub> H <sub>34</sub> Bi <sub>2</sub> Cl <sub>12</sub> N <sub>3</sub> | C <sub>24</sub> H <sub>34</sub> Bi <sub>2</sub> Cl <sub>12</sub> N <sub>3</sub> |
| <b>Formula weight</b>                | 1207.9                                                                          | 1207.9                                                                          |
| <b>Space group</b>                   | <i>P</i> 21/ <i>m</i>                                                           | <i>P</i> 21/ <i>m</i>                                                           |
| <b>Crystal system</b>                | Monoclinic                                                                      | Monoclinic                                                                      |
| <b>a/ Å</b>                          | 9.5873 (11)                                                                     | 9.6132 (10)                                                                     |
| <b>b/ Å</b>                          | 22.042(3)                                                                       | 22.150 (3)                                                                      |
| <b>c/ Å</b>                          | 9.7222(12)                                                                      | 9.7574 (12)                                                                     |
| <b>β/°</b>                           | 97.630(3)                                                                       | 97.628(3)                                                                       |
| <b>Volume/ Å<sup>3</sup></b>         | 2036.3(4)                                                                       | 2059.3(4)                                                                       |
| <b>Z</b>                             | 2                                                                               | 2                                                                               |
| <b>F (000)</b>                       | 1138                                                                            | 1094                                                                            |
| <b>GOF</b>                           | 1.075                                                                           | 0.97                                                                            |
| <b>R1[<i>I</i>&gt;2σ(<i>I</i>)]</b>  | 0.065                                                                           | 0.038                                                                           |
| <b>wR2[<i>I</i>&gt;2σ(<i>I</i>)]</b> | 0.152                                                                           | 0.100                                                                           |

**Table S2.** Crystal data and structure refinements for compound **2** at 273 K

|                                      | <b>LTP (273 K)</b>                                                |
|--------------------------------------|-------------------------------------------------------------------|
| <b>Empirical formula</b>             | C <sub>16</sub> H <sub>22</sub> Cl <sub>6</sub> N <sub>2</sub> Zn |
| <b>Formula weight</b>                | 520.42                                                            |
| <b>Space group</b>                   | <i>P</i> $\bar{1}$                                                |
| <b>Crystal system</b>                | Triclinic                                                         |
| <b>a/ Å</b>                          | 7.4644 (3)                                                        |
| <b>b/ Å</b>                          | 7.7388 (3)                                                        |
| <b>c/ Å</b>                          | 20.7344 (9)                                                       |
| <b>β/°</b>                           | 97.630 (3)°                                                       |
| <b>Volume/ Å<sup>3</sup></b>         | 1104.52 (8)                                                       |
| <b>Z</b>                             | 2                                                                 |
| <b>F (000)</b>                       | 528                                                               |
| <b>GOF</b>                           | 1.06                                                              |
| <b>R1[<i>I</i>&gt;2σ(<i>I</i>)]</b>  | 0.041                                                             |
| <b>wR2[<i>I</i>&gt;2σ(<i>I</i>)]</b> | 0.099                                                             |

**Table S3.** Crystal data and structure refinements for compound **3** at 273 K.

|                              | <b>LTP (273 K)</b>                                 |
|------------------------------|----------------------------------------------------|
| <b>Empirical formula</b>     | C <sub>8</sub> H <sub>11</sub> CdCl <sub>4</sub> N |
| <b>Formula weight</b>        | 375.38                                             |
| <b>Space group</b>           | <i>Pnma</i>                                        |
| <b>Crystal system</b>        | Orthorhombic                                       |
| <b>a/ Å</b>                  | 14.446 (2)                                         |
| <b>b/ Å</b>                  | 6.8496 (10)                                        |
| <b>c/ Å</b>                  | 12.429 (2)                                         |
| <b>β/°</b>                   | 97.630(3)                                          |
| <b>Volume/ Å<sup>3</sup></b> | 1229.9 (3)                                         |
| <b>Z</b>                     | 4                                                  |
| <b>F (000)</b>               | 728                                                |
| <b>GOF</b>                   | 1.05                                               |
| <b>R1[ I&gt;2σ(I)]</b>       | 0.037                                              |
| <b>wR2[ I&gt;2σ(I)]</b>      | 0.089                                              |

**Table S4.** Crystal data and structure refinements for compound **4** at 273 K, 358K and 365K.

|                              | <b>LTP (273 K)</b>                                               | <b>RTP (358 K)</b>                                               | <b>HTP (365K)</b>                                                |
|------------------------------|------------------------------------------------------------------|------------------------------------------------------------------|------------------------------------------------------------------|
| <b>Empirical formula</b>     | C <sub>16</sub> H <sub>20</sub> Cl <sub>6</sub> MnN <sub>2</sub> | C <sub>16</sub> H <sub>20</sub> Cl <sub>6</sub> MnN <sub>2</sub> | C <sub>16</sub> H <sub>20</sub> Cl <sub>6</sub> MnN <sub>2</sub> |
| <b>Formula weight</b>        | 507.98                                                           | 507.98                                                           | 507.98                                                           |
| <b>Space group</b>           | <i>P</i> $\bar{1}$                                               | <i>P</i> $\bar{1}$                                               | <i>P</i> $\bar{1}$                                               |
| <b>Crystal system</b>        | Triclinic                                                        | Triclinic                                                        | Triclinic                                                        |
| <b>a/ Å</b>                  | 7.530                                                            | 7.568 (4)                                                        | 7.5849 (13)                                                      |
| <b>b/ Å</b>                  | 7.699                                                            | 8.088 (5)                                                        | 7.7567(16)                                                       |
| <b>c/ Å</b>                  | 20.946                                                           | 20.838 (13)                                                      | 21.082 (4)                                                       |
| <b>β/°</b>                   | 94.56                                                            | 95.451 (9)                                                       | 94.901 (4)                                                       |
| <b>Volume/ Å<sup>3</sup></b> | 1133.2                                                           | 1147.4 (12)                                                      | 1154.5 (4)                                                       |
| <b>Z</b>                     | 2                                                                | 2                                                                | 2                                                                |
| <b>GOF</b>                   | 1.038                                                            | 0.976                                                            | 1.05                                                             |
| <b>R1[ I&gt;2σ(I)]</b>       | 0.0311                                                           | 0.089                                                            | 0.046                                                            |
| <b>wR2[ I&gt;2σ(I)]</b>      | 0.0799                                                           | 0,248                                                            | 0.133                                                            |

**Table S5.** Selected bond lengths [Å] and bond angles for compound **1** at 273 K.

| bond lengths [Å] |           | bond angles [Å] |            |
|------------------|-----------|-----------------|------------|
| Bi1—Cl5          | 2.545 (2) | Cl5—Bi1—Cl3     | 92.50 (8)  |
| Bi1—Cl1          | 2.564 (2) | Cl1—Bi1—Cl3     | 90.91 (9)  |
| Bi1—Cl3          | 2.627 (2) | Cl5—Bi1—Cl6     | 92.85 (8)  |
| Bi1—Cl6          | 2.862 (2) | Cl1—Bi1—Cl6     | 89.76 (8)  |
| Bi1—Cl4          | 2.907 (2) | Cl3—Bi1—Cl6     | 174.56 (8) |
| Bi1—Cl2          | 2.952 (2) | Cl5—Bi1—Cl4     | 85.80 (8)  |
| Cl2—Bi1i         | 2.952 (2) | Cl1—Bi1—Cl4     | 170.15 (7) |
| Cl4—Bi1i         | 2.907 (2) | Cl3—Bi1—Cl4     | 98.92 (8)  |
|                  |           | Cl6—Bi1—Cl4     | 80.50 (7)  |
|                  |           | Cl5—Bi1—Cl2     | 162.62 (7) |
|                  |           | Cl1—Bi1—Cl2     | 101.50 (8) |
|                  |           | Cl3—Bi1—Cl2     | 96.37 (8)  |
|                  |           | Cl6—Bi1—Cl2     | 78.21 (7)  |
|                  |           | Cl4—Bi1—Cl2     | 78.09 (7)  |

**Table S6.** Selected bond lengths [Å] and bond angles for compound **1** at 320 K.

| bond lengths [Å]     |             | bond angles [Å] |            |
|----------------------|-------------|-----------------|------------|
| Bi1—Cl6              | 2.5448 (14) | Cl6—Bi1—Cl4     | 93.18 (5)  |
| Bi1—Cl4              | 2.5686 (15) | Cl6—Bi1—Cl3     | 92.57 (5)  |
| Bi1—Cl3              | 2.6236 (14) | Cl4—Bi1—Cl3     | 91.09 (5)  |
| Bi1—Cl5              | 2.8726 (12) | Cl6—Bi1—Cl5     | 93.18 (5)  |
| Bi1—Cl1              | 2.9094 (13) | Cl4—Bi1—Cl5     | 89.67 (5)  |
| Bi1—Cl2              | 2.9600 (14) | Cl3—Bi1—Cl5     | 174.14 (5) |
| Cl1—Bi1 <sup>i</sup> | 2.9094 (13) | Cl6—Bi1—Cl1     | 86.02 (5)  |
| Cl2—Bi1 <sup>i</sup> | 2.9600 (14) | Cl4—Bi1—Cl1     | 169.93 (5) |
| Cl5—Bi1 <sup>i</sup> | 2.8726 (12) | Cl3—Bi1—Cl1     | 98.97 (5)  |
|                      |             | Cl5—Bi1—Cl1     | 80.36 (4)  |
|                      |             | Cl6—Bi1—Cl2     | 163.14 (5) |
|                      |             | Cl4—Bi1—Cl2     | 101.22 (5) |
|                      |             | Cl3—Bi1—Cl2     | 95.83 (5)  |
|                      |             | Cl5—Bi1—Cl2     | 78.33 (5)  |
|                      |             | Cl1—Bi1—Cl2     | 78.26 (5)  |

**Table S7.** Selected bond lengths [Å] and bond angles for compound **2** at 273 K.

| bond lengths [Å] |             | bond angles [Å] |            |
|------------------|-------------|-----------------|------------|
| Zn1—Cl3          | 2.2382 (10) | Cl3—Zn1—Cl1     | 114.08 (4) |
| Zn1—Cl2          | 2.2661 (9)  | Cl3—Zn1—Cl2     | 114.11 (4) |
| Zn1—Cl4          | 2.3104 (9)  | Cl1—Zn1—Cl2     | 106.79 (3) |
| Cl1—Zn1          | 2.2488 (9)  | Cl3—Zn1—Cl4     | 104.87 (4) |
|                  |             | Cl1—Zn1—Cl4     | 108.18 (3) |
|                  |             | Cl2—Zn1—Cl4     | 108.58 (3) |

**Table S8.** Selected bond lengths [Å] and bond angles for compound **3** at 273 K.

| bond lengths [Å]       |            | bond angles [Å]                           |              |
|------------------------|------------|-------------------------------------------|--------------|
| Cd1—Cl2 <sup>i</sup>   | 2.6098 (6) | Cl2 <sup>i</sup> —Cd1—Cl2                 | 180.00 (3)   |
| Cd1—Cl2                | 2.6098 (6) | Cl2 <sup>i</sup> —Cd1—Cl4                 | 97.42 (2)    |
| Cd1—Cl4                | 2.6516 (7) | Cl2—Cd1—Cl4                               | 82.58 (2)    |
| Cd1—Cl4 <sup>i</sup>   | 2.6516 (7) | Cl2 <sup>i</sup> —Cd1—Cl4 <sup>i</sup>    | 82.58 (2)    |
| Cd1—Cl3                | 2.6792 (6) | Cl2—Cd1—Cl4 <sup>i</sup>                  | 97.42 (2)    |
| Cd1—Cl3 <sup>i</sup>   | 2.6792 (6) | Cl4—Cd1—Cl4 <sup>i</sup>                  | 180.0        |
| Cd1—Cd1 <sup>ii</sup>  | 3.4248 (5) | Cl2 <sup>i</sup> —Cd1—Cl3                 | 97.30 (2)    |
| Cd1—Cd1 <sup>iii</sup> | 3.4248 (5) | Cl2—Cd1—Cl3                               | 82.70 (2)    |
| Cl2—Cd1 <sup>iii</sup> | 2.6098 (6) | Cl4—Cd1—Cl3                               | 82.64 (2)    |
| Cl3—Cd1 <sup>iii</sup> | 2.6792 (6) | Cl4 <sup>i</sup> —Cd1—Cl3                 | 97.36 (2)    |
| Cl4—Cd1 <sup>iii</sup> | 2.6516 (7) | Cl2 <sup>i</sup> —Cd1—Cl3 <sup>i</sup>    | 82.70 (2)    |
|                        |            | Cl2—Cd1—Cl3 <sup>i</sup>                  | 97.30 (2)    |
|                        |            | Cl4—Cd1—Cl3 <sup>i</sup>                  | 97.36 (2)    |
|                        |            | Cl4 <sup>i</sup> —Cd1—Cl3 <sup>i</sup>    | 82.64 (2)    |
|                        |            | Cl3—Cd1—Cl3 <sup>i</sup>                  | 180.0        |
|                        |            | Cl2 <sup>i</sup> —Cd1—Cd1 <sup>ii</sup>   | 48.993 (12)  |
|                        |            | Cl2—Cd1—Cd1 <sup>ii</sup>                 | 131.007 (12) |
|                        |            | Cl4—Cd1—Cd1 <sup>ii</sup>                 | 130.226 (13) |
|                        |            | Cl4 <sup>i</sup> —Cd1—Cd1 <sup>ii</sup>   | 49.775 (13)  |
|                        |            | Cl3—Cd1—Cd1 <sup>ii</sup>                 | 129.728 (12) |
|                        |            | Cl3 <sup>i</sup> —Cd1—Cd1 <sup>ii</sup>   | 50.272 (12)  |
|                        |            | Cl2 <sup>i</sup> —Cd1—Cd1 <sup>iii</sup>  | 131.007 (12) |
|                        |            | Cl2—Cd1—Cd1 <sup>iii</sup>                | 48.993 (12)  |
|                        |            | Cl4—Cd1—Cd1 <sup>iii</sup>                | 49.774 (13)  |
|                        |            | Cl4 <sup>i</sup> —Cd1—Cd1 <sup>iii</sup>  | 130.225 (13) |
|                        |            | Cl3—Cd1—Cd1 <sup>iii</sup>                | 50.272 (12)  |
|                        |            | Cl3 <sup>i</sup> —Cd1—Cd1 <sup>iii</sup>  | 129.728 (12) |
|                        |            | Cd1 <sup>ii</sup> —Cd1—Cd1 <sup>iii</sup> | 180.0        |
|                        |            | Cd1—Cl2—Cd1 <sup>iii</sup>                | 82.01 (2)    |
|                        |            | Cd1 <sup>iii</sup> —Cl3—Cd1               | 79.46 (2)    |
|                        |            | Cd1—Cl4—Cd1 <sup>iii</sup>                | 80.45 (3)    |

**Table S9.** Selected bond lengths [Å] and bond angles for compound **4** at 273 K.

| bond lengths [Å] |            | bond angles [Å] |            |
|------------------|------------|-----------------|------------|
| Cl1—Mn1          | 2.3628 (6) | Cl5—Mn1—Cl2     | 114.16 (3) |
| Cl2—Mn1          | 2.3390 (6) | Cl5—Mn1—Cl1     | 113.70 (3) |
| Cl4—Mn1          | 2.3973 (6) | Cl2—Mn1—Cl1     | 106.65 (2) |
| Cl5—Mn1          | 2.3338 (6) | Cl5—Mn1—Cl4     | 104.41 (3) |
|                  |            | Cl2—Mn1—Cl4     | 108.31 (2) |
|                  |            | Cl1—Mn1—Cl4     | 109.47 (2) |

**Table S10.** Selected bond lengths [Å] and bond angles for compound **4** at 358 K.

| bond lengths [Å] |           | bond angles [Å] |             |
|------------------|-----------|-----------------|-------------|
| Mn1—Cl1          | 2.332 (3) | Cl1—Mn1—Cl3     | 118.90 (12) |
| Mn1—Cl3          | 2.347 (3) | Cl1—Mn1—Cl4     | 116.12 (12) |
| Mn1—Cl4          | 2.347 (3) | Cl3—Mn1—Cl4     | 104.23 (11) |
| Mn1—Cl2          | 2.424 (3) | Cl1—Mn1—Cl2     | 103.29 (12) |
|                  |           | Cl3—Mn1—Cl2     | 108.30 (11) |
|                  |           | Cl4—Mn1—Cl2     | 105.04 (11) |

**Table S11.** Selected bond lengths [Å] and bond angles for compound **4** at 365 K.

| bond lengths [Å] |             | bond angles [Å] |            |
|------------------|-------------|-----------------|------------|
| Mn1—Cl6          | 2.3277 (12) | Cl6—Mn1—Cl4     | 113.79 (5) |
| Mn1—Cl4          | 2.3386 (11) | Cl6—Mn1—Cl5     | 114.21 (5) |
| Mn1—Cl5          | 2.3589 (10) | Cl4—Mn1—Cl5     | 106.44 (4) |
| Mn1—Cl3          | 2.3916 (10) | Cl6—Mn1—Cl3     | 104.38 (5) |
|                  |             | Cl4—Mn1—Cl3     | 108.66 (4) |
|                  |             | Cl5—Mn1—Cl3     | 109.22 (4) |

**Table S12.** Hinside-Cloutside surface area, mean di and mean de of different amine in **1** and **4**.

| Compound | Temperature  | Hinside-Cloutside surface area |       | Mean di | Mean de |
|----------|--------------|--------------------------------|-------|---------|---------|
| <b>1</b> | <b>273 K</b> | Cation 1                       | 39.5% | 1.6917  | 1.9380  |
|          |              | Cation2                        | 43.3% | 1.7691  | 2.0231  |
|          | <b>320K</b>  | Cation1                        | 38.8% | 1.7013  | 1.9266  |
|          |              | Cation2                        | 42.3% | 1.7367  | 2.0197  |
| <b>2</b> | <b>273 K</b> | Cation1                        | 33.2% | 1.6660  | 1.9042  |
|          |              | Cation2                        | 32.6% | 1.6622  | 1.8729  |
|          | <b>365K</b>  | Cation1                        | 31.9% | 1.6438  | 1.8650  |
|          |              | Cation2                        | 31.5% | 1.6499  | 1.8906  |

## Reference

1. Turner, M. J.; McKinnon, J. J.; Wolff, S. K.; Grimwood, D. J.; Spackman, P. R.; Jayatilaka, D.; Spackman, M. A. CrystalExplorer17; University of Western Australia, 2017, <http://hirshfeldsurface.net>
